# Gene expression shapes the patterns of parallel evolution of herbicide resistance in the agricultural weed *Monochoria vaginalis*

Shinji Tanigaki<sup>1</sup>, Akira Uchino<sup>2</sup>, Shigenori Okawa<sup>3</sup>, Chikako Miura<sup>4</sup>, Kenshiro Hamamura<sup>5</sup>, Mitsuhiro Matsuo<sup>6</sup>, Namiko Yoshino<sup>7</sup>, Naoya Ueno<sup>8</sup>, Yusuke Toyama<sup>9</sup>, Naoya Fukumi<sup>10</sup>, Eiji Kijima<sup>11</sup>, Taro Masuda<sup>12</sup>, Yoshiko Shimono<sup>1</sup>, Tohru Tominaga<sup>1</sup>, Satoshi Iwakami<sup>1\*</sup>

<sup>1</sup>Graduate school of agriculture, Kyoto University, Kitashirakawa-Oiwake-cho, Sakyo-ku, Kyoto 606-8502, Japan

<sup>2</sup>Central Region Agricultural Research Center, National Agriculture and Food Research Organization, Tsu 514-2392, Japan

<sup>3</sup>Miyagi Prefectural Furukawa Agricultural Experiment Station, Fukoku 88, Furukawa-Osaki, Osaki 989-6227, Japan

<sup>4</sup>Akita Prefectural Agricultural Experiment Station, 34-1 Yuwaikawa-azagenpachizawa, Akita 010-1231, Japan

<sup>5</sup>Japan Association for Advancement of Phyto-Regulators (JAPR), 860 Kashiwada-cho, Ushiku 300-1211, Japan

<sup>6</sup>Field Science Center, Faculty of Agriculture, University of Miyazaki, 1-1 Gakuen-kibanadai-nishi, Miyazaki 889-2192, Japan

<sup>7</sup>Tohoku Agricultural Research Center, National Agriculture and Food Research Organization, 50 Harajukuminami, Arai, Fukushima 960-2156, Japan

<sup>8</sup>Yamanashi Prefectural Agritechnology Center, 1100 Shimoimai, Kai 400-0105, Japan

<sup>9</sup>Shizuoka Prefectural Research Institute of Agriculture and Forestry, 678-1 Tomigaoka, Iwata 438-0803, Japan

<sup>10</sup>Tottori Agricultural Experiment Station, 260 Hashimoto, Tottori 680-1142, Japan

<sup>11</sup>Yamaguchi Prefectural Agriculture and Forestry General Technology Center, 1-1-1 Ouchihikami, Yamaguchi 753-0231, Japan

<sup>12</sup>Faculty of Agriculture, Setsunan University, 45-1 Nagaotoge-cho, Hirakata 573-0101, Japan

\*Corresponding Author, E-mail: [iwakami.satoshi.2v@kyoto-u.ac.jp](mailto:iwakami.satoshi.2v@kyoto-u.ac.jp), Phone: +81-75-753-6064

## 33 Abstract

34 The evolution of herbicide resistance in weeds is an example of parallel evolution, through  
 35 which genes encoding herbicide target proteins are repeatedly represented as evolutionary loci.  
 36 The number of herbicide target-site genes differs among species, and little is known regarding  
 37 the effects of duplicate gene copies on the evolution of herbicide resistance. We investigated  
 38 the evolution of herbicide resistance in *Monochoria vaginalis*, which carries five copies of  
 39 sulfonylurea target-site acetolactate synthase (*ALS*) genes. Suspected resistant populations  
 40 collected across Japan were investigated for herbicide sensitivity and *ALS* gene sequences,  
 41 followed by functional characterisation and *ALS* gene expression analysis. We identified over  
 42 60 resistant populations, all of which carried resistance-conferring amino acid substitutions  
 43 exclusively in *MvALS1* or *MvALS3*. All *MvALS4* alleles carried a loss-of-function mutation.  
 44 Although the enzymatic properties of ALS encoded by these genes were not markedly  
 45 different, the expression of *MvALS1* and *MvALS3* was prominently higher among all *ALS*  
 46 genes. The higher expression of *MvALS1* and *MvALS3* is the driving force of the biased  
 47 representation of genes during the evolution of herbicide resistance in *M. vaginalis*. Our  
 48 findings highlight that gene expression is a key factor in creating evolutionary hotspots.

49

50 **Keywords:** acetoxy acid synthase, acetolactate synthase, convergent evolution,  
 51 evolutionary constraint, target-site resistance, weed evolution

52

## 53 INTRODUCTION

54 Agricultural weeds are often subject to artificial lethal stresses employed in an effort to  
 55 increase crop yield. Such weeding stresses, in turn, act as unintentional selection pressures  
 56 driving the evolution of weed populations. While multiple evolved traits related to weed  
 57 adaptation in agricultural ecosystems have been documented, such as flowering phenology,  
 58 mimicry morphology, seed shattering, seed dormancy, and competitiveness (Fukano, Guo,  
 59 Uchida, Tachiki, & Cornelissen, 2020; Waselkov, Regenold, Lum, & Olsen, 2020; Wedger &  
 60 Olsen, 2018; Ye et al., 2019), herbicide resistance remains among the best studied and  
 61 characterised trait (Powles & Yu, 2010). Evolved herbicide resistance has been documented  
 62 worldwide in as many as 263 weed species (Heap, 2021), posing a great threat to the current  
 63 global food security.

64 While weed resistance has often been studied from an agricultural viewpoint as a  
 65 threat to food security, it has also attracted the attention of evolutionary biologists as a classic  
 66 example of an ‘evolution in action’ (Baucom, 2019). An important insight from studies on  
 67 weed resistance is that nature often mimics itself: certain genes have repeatedly acted as the  
 68 major components in the evolution of resistance (Martin & Orgogozo, 2013). In particular,  
 69 resistance to sulfonylurea (SU) herbicides represents the extreme parallelism of molecular  
 70 evolution. SUs inhibit acetolactate synthase (ALS, or acetohydroxy acid synthase), which  
 71 catalyses the first committed step in the biosynthesis of branched-chain amino acids (Tranel &  
 72 Wright, 2002). Due to their low toxicity to animals, high crop selectivity, and high efficacy at  
 73 low doses, SUs are among the most frequently used herbicides in many countries, including  
 74 Japan (Hamamura, 2018; Peters & Strek, 2018). Resistance to SUs, particularly in broadleaf

75 weeds, is caused mainly by a non-synonymous mutation in the *ALS* gene (Yu & Powles,  
76 2014). The amino acid substitution (AAS) caused by this mutation leads to a conformational  
77 alteration in the binding site of SUs, resulting in insufficient ALS inhibition. AASs inducing  
78 SU resistance have been reported in as many as eight natural weed populations, and most of  
79 these mutations were not significantly associated with fitness cost (Yu & Powles, 2014). This  
80 nature is considered as the driving force to render *ALS* loci as an evolutionary hotspot for  
81 resistance to SU herbicides (Baucom, 2019).

82 However, little attention has been paid to the effects of duplicated gene copies on  
83 the evolution of ALS herbicide resistance. Having undergone whole genome duplications  
84 during the long course of evolution (Clark & Donoghue, 2018), many plants possess  
85 duplicated copies of *ALS* genes; in addition to polyploid species, even diploid species such as  
86 *Senecio vulgaris* and *Zea mays* exemplify this scenario (Delye, Causse, & Michel, 2016;  
87 Svitashchev et al., 2015). While recent studies have shed some light on the ‘dilution effect’  
88 (sensu Iwakami, Uchino, Watanabe, Yamasue, & Inamura, 2012) caused by duplicated gene  
89 copies (e.g. Deng et al., 2017; Yamato, Sada, & Ikeda, 2013), little data are available on the  
90 roles of such duplicated copies in resistance evolution. Few studies have identified cases in  
91 which resistance-conferring mutations occur in all *ALS* copies, such as in *Schoenoplectiella*  
92 *juncoides* (Sada & Uchino, 2017), *Descurainia sophia* (Xu, Xu, Li, & Zheng, 2020), *Senecio*  
93 *valgaris* (Delye et al., 2016), and *Echinochloa crus-galli* (Löbmann, Schulte, Runge, Christen,  
94 & Petersen, 2021), implying that all these loci act as evolutionary hotspots. Meanwhile, the  
95 biased frequency of specific *ALS* loci has also been reported during the evolution of resistance  
96 in *Schoenoplectiella mucronatus* (Scarabel, Locascio, Furini, Sattin, & Varotto, 2010),



although only two populations have been investigated. Most studies thus far have investigated only a limited number of populations; therefore, whether there is indeed a bias in the occurrence of resistance-conferring mutations among *ALS* loci remains unclear.

*Monochoria vaginalis* (syn. *Pontederia vaginalis*) is a noxious allohexaploid ( $2n = 4x = 52$ ) weed in temperate and tropical Asian paddy fields (Holm, Plucknett, Pancho, & Herberger, 1977). It carries five *ALS* loci, with all genes transcribed at the seedling stage (Iwakami et al., 2020) when plants are exposed to herbicides in agricultural fields. Among the limited number of populations tested to date, mutations known to confer *ALS* herbicide resistance have been reported exclusively in *MvALS1* or *MvALS3* (e.g. Iwakami et al., 2020; Ohsako & Tominaga, 2007), despite the presence of multiple potential evolutionary hotspots for resistance. In the present study, we confirmed the occurrence of resistance-conferring mutations exclusively in *MvALS1* and *MvALS3* among 68 resistant populations across Japan. Enzyme kinetics and expression analysis of each *ALS* copy and its product unveiled the potential mechanisms that make these two loci the hotspots of resistance evolution.

## MATERIALS AND METHODS

### *M. vaginalis*

*M. vaginalis* was collected from paddy fields across Japan (Figure 1a-b; Table S1). Most of the paddy fields were small, measuring 0.1 to 0.3 ha on average. Plants from a single paddy field are hereafter referred to as a population. The plants were either directly used for resistance diagnosis using the rooting assay or cultivated for the collection of selfed seeds for the following pot assay (Figure 1c).

119

## 120 **Resistance diagnosis in *M. vaginalis***

121 Resistance to SU herbicides was diagnosed using the rooting assay with 45  $\mu\text{g}\cdot\text{L}^{-1}$  of  
 122 bensulfuron-methyl, as described by Hamamura et al. (2003). In some populations, the selfed  
 123 seeds were used for resistance diagnosis using a recommended dose of imazosulfuron [90 g  
 124 active ingredient (a.i.) $\cdot\text{ha}^{-1}$ ], as described previously (Iwakami et al., 2020). Briefly,  
 125 germinated seeds were transplanted into autoclaved soil under flooded conditions. When  
 126 plants reached the three-leaf stage, a commercial formulation of imazosulfuron (75% a.i.) was  
 127 applied to the surface of standing water. The survival rate of plants was evaluated at 3 weeks  
 128 post application.

129

## 130 **Imazosulfuron dose–response analysis in *M. vaginalis***

131 KST1, KOM1, SMM23, AKT3, NRS2, and SMM13 populations were used in the assay. The  
 132 dose–response analysis was performed as described by Iwakami et al. (2020), with some  
 133 modifications. Briefly, five seedlings were transplanted into autoclaved soil in 100  $\text{cm}^2$  plastic  
 134 pots. The plants were cultivated under flooded conditions. At the two-to-three–leaf stage, the  
 135 commercial formulation of imazosulfuron was applied to the surface of standing water in  
 136 individual pots at a rate calculated for the area of each pot (0, 0.09, 0.9, 9, 90, 900, 9,000, and  
 137 90,000 g a.i. $\cdot\text{ha}^{-1}$ ). At 3 weeks post application, the shoots were harvested and dry weight was  
 138 measured.

139

## 140 **Sequencing of *ALS* genes in *M. vaginalis***

DNA was extracted from the leaves of plants subjected to the herbicide sensitivity assay using the cetyltrimethylammonium bromide (CTAB) method (Murray & Thompson, 1980). For some old populations, DNA was extracted from dead seeds using the Plant Genomic DNA Kit (Tiangen, Beijing, China). The entire coding sequence of *MvALS1* to *MvALS5* was PCR-amplified as described by Iwakami et al. (2020). The entire coding region of the amplicons was directly sequenced.

The nucleotide diversity of each *ALS* gene was calculated using the DnaSP 6 (Rozas et al., 2017). Previously reported full-length coding sequences of three populations (SMM13, SMM23, and TOT1) were also used in the analysis (Iwakami et al., 2020).

### **Expression and *in vitro* assay of ALS**

The pGEX6P-1 vector (Cytiva, Tokyo, Japan) was digested with SalI-HF (New England Biolabs, Tokyo, Japan). Alleles of *MvALS1/2/3/5* from the sensitive population (SMM13) were individually ligated at the SalI site of pGEX-6 via SLiCE reaction following the protocol described by Motohashi (2015). Each *ALS* gene was expressed without the estimated chloroplast transit peptide (CTP) region corresponding to 1-86 residues of *A. thaliana* ALS (Chang & Duggleby, 1997; Singh, Schmitt, Lillis, Hand, & Misra, 1991). The primers used for the SLiCE reactions are listed in Table S2. The resultant expression vector was transformed into *Escherichia coli* BL21 (DE3) cells.

The transformed cells were inoculated in 200 mL of LB medium containing 100  $\mu\text{g}\cdot\text{mL}^{-1}$  of ampicillin and cultured at 37°C. When OD<sub>600</sub> reached 0.4-0.7, isopropyl  $\beta$ -D-thiogalactopyranoside was added to the medium at a final concentration of 1 mM, and

the culture was continued at 16°C for 24 h. The cells were harvested by centrifugation at 14,000 ×g for 10 min. The cells were resuspended in phosphate-buffered saline with 1% Triton X-100, 1 mM phenylmethylsulfonyl fluoride, 5 mM dithiothreitol, and 0.5 mM MgCl<sub>2</sub> and sonicated for 5 min on ice. GST-fused ALS was batch-purified with glutathione Sepharose 4B (Cytiva) according to the manufacturer's protocol. ALS was eluted in 400 µL of 50 mM Tris-HCl buffer (pH 8.0) containing 10 mM glutathione, followed by the addition of glycerol at a final concentration of 10% (v/v).

ALS activity was evaluated as described by Chang and Duggleby (1997), with some modifications. The reaction mixture (300 µL) containing 20 mM K<sub>2</sub>HPO<sub>4</sub>/KH<sub>2</sub>PO<sub>4</sub> (pH 7.0), 50 mM sodium pyruvate, 10 mM MgCl<sub>2</sub>, 1 mM thiamine diphosphate, 20 µM FAD, 0.5 ng enzyme, and varying concentrations of sodium pyruvate (0, 0.78, 1.56, 3.12, 6.25, 12.5, and 25 mM) was incubated at 30°C for 60 min, and the reaction was terminated by adding 30 µL of 6N H<sub>2</sub>SO<sub>4</sub>. The resultant solution was incubated at 60°C for 15 min, followed by the addition of 300 µL creatine (0.5%, w/v) and α-naphthol (0.5%, w/v, in 2.5N NaOH). Absorbance was measured at 525 nm. The data were plotted and curve-fitted to the Michaelis-Menten equation using the drc package (ver. 3.0.1) (Ritz, Baty, Streibig, & Gerhard, 2015). The Michaelis-Menten constant ( $K_m$ ) and turnover number ( $k_{cat}$ ) was determined for each ALS. The experiments were conducted in triplicate and repeated twice.

Protein concentration was determined using Bio-Rad Protein Assay Dey Reagent Concentrate (Bio-Rad, CA) with bovine serum albumin as the standard, following manufacturer's instructions.

## Targeted mutagenesis of *ALS* genes

Alleles of *MvALS1/2/3/5* from the SMM13 population and a deleted allele of *MvALS5* from the SMM3 population were cloned into the pCRblunt vector (Thermo Fisher Scientific, Tokyo, Japan). The codons for Pro197 of the *ALS* genes were mutated to carry a resistance-conferring Ser codon. Targeted mutagenesis was performed according to the protocol in QuikChange Site-Directed Mutagenesis System (Stratagene, CA, USA), with some modifications. Briefly, the clones were used as a template for PCR using PrimeSTAR MAX (TaKaRa, Kusatsu, Japan); the primers are listed in Table S2. The PCR products were treated with DpnI-HF (New England Biolabs). The resultant solution was used for *E. coli* DH5 $\alpha$  transformation. The success of targeted mutagenesis was confirmed by sequencing the extracted plasmids.

## Transformation and phenotyping of transgenic *A. thaliana*

The Pro197Ser-mutated *ALS* genes were inserted into the pCambia1390 vector under the cauliflower mosaic virus 35S promoter using the In-Fusion DH Cloning Kit (TaKaRa), as described previously (Iwakami et al., 2019). The primers used in this reaction are listed in Table S2. *A. thaliana* transformation was performed using the floral dip method, and the transformants were selected as described previously (Guo et al., 2019).

To quantify transgene expression, real-time RT-PCR was performed. Briefly, RNA from 10-day-old T3 homozygous lines was extracted using the Plant Total RNA Mini Kit (Favorgen, Ping-Tung, Taiwan). Contaminated DNA in the extracted RNA was removed using the Turbo DNA-free kit (Thermo Fisher Scientific). The resultant RNA was reverse transcribed according to the method described by Iwakami et al. (2019). PCR was run using

THUNDERBIRD SYBR qPCR Mix (TOYOBO, Osaka, Japan) on QuantStudi 12K Flex Real-Time PCR System (Thermo Fisher Scientific). The primers for transgene expression were designed using the terminator sequence of pCAMBIA1390. *GAPDH* was used as the internal control; primers developed by Czechowski, Stitt, Altmann, Udvardi, and Scheible (2005) were used. Data were analysed using the  $\Delta\Delta CT$  method (Schmittgen & Livak, 2008).

Imazosulfuron sensitivity of the transformants was evaluated as described previously (Dimaano, Yamaguchi, Fukunishi, Tominaga, & Iwakami, 2020) with some modifications. Seeds were sown on Murashige and Skoog medium (Murashige & Skoog, 1962) containing various concentrations of imazosulfuron. Plants were grown for 10 days at 22°C. Sensitivity was evaluated based on the emergence of true leaves. The dose that inhibited the growth to 50% (GR<sub>50</sub>) and 90% (GR<sub>90</sub>) compared with the control was calculated by fitting the log-logistic curve (two-parameter model) using the drc package (ver. 3.0.1) (Ritz et al., 2015).

### **Gene expression analysis in *M. vaginalis***

SMM13 and SMM23 were used as representatives of the sensitive and resistant populations, respectively. Germinated seeds were transplanted into autoclaved soils. Six plants from each population were grown in water until the three-leaf stage. Half of the plants were treated with imazosulfuron at a concentration of 90 g a.i.·ha<sup>-1</sup>. At 24 h post application, the shoots of all plants were snap frozen in liquid nitrogen and stored at -80°C until further use. RNA was extracted using the RNeasy Plant Mini Kit (Qiagen, Venlo, Netherlands), followed by DNase treatment using the Turbo DNA-free kit (Thermo Fisher Scientific).

To estimate approximate transcript abundance, PCR products generated by the primers designed based on the completely conserved regions among the five copies of *ALS* genes (Table S2) were cloned into the pCRblunt vector (Thermo Fisher Scientific). Over 50 clones were sequenced. cDNA was prepared from the RNA of an imazosulfuron-treated sensitive plant. The experiment was performed twice.

For RNA-Seq analysis, 12 RNA samples were shipped to GENEWIZ (Kawaguchi, Japan) for stranded RNA-Seq using Illumina HiSeq 4000 (150-bp paired-end reads). Contaminated adaptor sequences were trimmed using ‘cutadapt’ (ver. 2.5) (Martin, 2011). Low-quality bases were removed using Trimmomatic (ver. 0.38) (Bolger, Lohse, & Usadel, 2014) with the following options: ‘LEADING:25 TRAILING:25 SLIDINGWINDOW:4:15 MINLEN:100’. Reads of a non-treated sensitive plant were used for contig assembly. The assembly was performed using Trinity (ver. 2.4.0) (Grabherr et al., 2011) with a k-mer size of 32. The biological function of the contigs was inferred using BLASTX (Blast+ ver. 2.9.0) (Camacho et al., 2009) against rice protein sequences (*Oryza sativa* MSU release 7). Only one contig under the identical gene identifier annotated by Trinity was used, as described by Ono et al. (2015). Briefly, from contigs with hits in the BLAST analysis, those with the highest bit score were selected, and from contigs without hits, the longest ones were selected. Contigs that were annotated as *ALS* genes were replaced with full-length *ALS* genes of *M. vaginalis* (DDBJ accession numbers: LC488950 to LC488953 and LC488956). The reads were mapped using Bowtie2 (ver. 2.3.4.1) (Langmead & Salzberg, 2012) with the following options: ‘-X 900 --very-sensitive --no-discordant --no-mixed --dpad 0 --gbar 99999999’. The concordantly mapped reads were counted using RSEM (ver. 1.3.2) (Li & Dewey, 2011). Multiple

comparisons were performed using the GLM approach with the quasi-likelihood F-test using the edgeR package (ver. 3.28.1.) (Robinson, McCarthy, & Smyth, 2010). Contigs with fold-changes of more or less than 2 and  $q$ -values less than 0.05 were evaluated as differentially expressed genes (DEGs).

## RESULTS

### Herbicide resistance of *M. vaginalis* collected across Japan

In this study, we sampled 113 suspected resistant populations across Japan and tested for ALS herbicide sensitivity using the rooting or pot assays (Figure 1). Sixty-six populations (58.4%) were confirmed to be resistant to ALS herbicides. All the resistant populations carried one or two homozygous mutations in the codons of *ALS* genes that are known to confer resistant to the herbicides, namely Pro197, A205, and D376, implying that *M. vaginalis* tend to evolve resistance to ALS inhibitors via target-site resistance (TSR) mechanisms as reported in many non-Poaceae weeds (Yu & Powles, 2014).

Analysis of the codons involved in ALS resistance in the 66 populations tested in this study and 2 previously reported resistant populations (Iwakami et al., 2020) revealed 9 types of resistance-conferring AASs. Mutations at Pro197 dominated the others, as reported in other species under SU selection (Yu & Powles, 2014) (Figure 2a-b). There was no clear association between mutation type (i.e. AASs and genes) and geographical region (Figure 1b; Table S1). Given the predominant self-pollinating nature of *M. vaginalis* and the small population size due to small paddy fields in Japan, most resistant populations have likely evolve resistance independently, as often observed in other self-pollinating species (Kreiner,



Stinchcombe, & Wright, 2018). As relatively rare cases, populations with two independent mutations were also found. AIZ2 and KR1 carried two resistance-conferring mutations, namely Pro197Ser and Asp376Glu, in a single gene (*MvALS1*), while YNZ1 carried Asp376Glu in *MvALS1* and Pro197Ser in *MvALS3*. In addition, mutations that have not been reported in natural weed populations, including Asp376Asn in NDA1 and A205Thr in ANP1, were also detected. Both mutations were confirmed to confer reduced sensitivity to SU in yeast (Bedbrook et al., 1995; Duggleby, Pang, Yu, & Guddat, 2003). Thus, AASs may be the causal mutations for resistance in these weed populations.

Transition was the dominant type of resistance-conferring mutation (Figure 2c), consistent with the results of a previous genome-wide mutation analysis of *A. thaliana* (Weng et al., 2019). The highest frequency of the Pro197Ser transition mutation (CCT→TCT) may be partly attributed to the nature of mutation patterns, although other factors such as high level resistance caused by this mutation (Sada, Ikeda, & Kizawa, 2013) may play a more important role in the observed bias.

Interestingly, the identified resistance-conferring mutations were exclusively found in *MvALS1* or *MvALS3*. To gain insights into this exclusivity, we further analysed the coding sequence of each *ALS* gene in 66 resistant and 30 sensitive populations, along with the previously reported sequences of 2 resistant and 1 sensitive populations (Iwakami et al., 2020) (Table S1). Coding sequences of all *ALS* genes in *M. vaginalis* were homozygous, contrary to the observation in obligate outcrossing weeds such as *Lolium rigidum* and *Papaver rhoeas* (Délye, Boucansaud, Pernin, & Le Corre, 2009; Délye, Pernin, & Scarabel, 2011). This result highlights the predominant self-pollinating nature of *M. vaginalis*. Consistent with previous

reports (Iwakami et al., 2020; Ohsako & Tominaga, 2007), a T insertion causing a frameshift was detected in all *MvALS4* alleles investigated in this study (Figure 2a-d). The products encoded by these mutant alleles lacked domains with pivotal roles in ALS activity, indicating that this gene does not encode the functional form of ALS. Thus, the prevalence of frame-shifted alleles in *MvALS4* among *M. vaginalis* populations in Japan explains the absence of resistance-conferring mutations in this gene. While all alleles were pseudogenised in *MvALS4*, variations were observed in *MvALS1* and *MvALS5*; as such a 13 bp deletion was detected in *MvALS1* in 1 population and a 40 bp deletion in *MvALS5* in 12 populations (Figure 2a, TableS1). The reading frame of these alleles also shifted, resulting in premature stop codons (Figure 2d). The putative loss-of-function alleles of *MvALS5* were found in populations sampled from various areas without any geographical association. Contrary to that in *MvALS4*, majority of the alleles were not pseudogenised in *MvALS1* and *MvALS5*. Therefore, allele pseudogenisation cannot solely explain the absence of resistance-conferring mutations in *MvALS1* and *MvALS5*.

The analysis of coding sequences revealed that genes with resistance-conferring alleles (*MvALS1* and *MvALS3*) showed a higher nucleotide diversity and greater variation in haplotype number (Figure 2e). This trend held true even when naturally selected resistance-conferring alleles were excluded from the analysis: a greater nucleotide diversity (per site) was observed at three and four positions, irrespective of the resistance selection, in *MvALS1* and *MvALS3*, respectively. Thus, *MvALS1* and *MvALS3* might be more prone to spontaneous mutations, some of which may occur by chance at the resistance-conferring codons. However, the difference in the rate of spontaneous mutations among genes can hardly

explain the all-or-nothing resistance-conferring alleles of the *ALS* gene family in *M. vaginalis*.

Other more pronounced factors may have played key roles in shaping these biased patterns.

## Functional characterisation of each ALS

To elucidate the mechanism underlying the biased dependence of *ALS* genes, we next compared the enzymatic functions of the protein encoded by the canonical alleles of each *ALS* gene. ALS activity of the purified GST-tagged protein was assessed (Figure S1). The activity of the recombinant proteins was evaluated based on the conversion of the produced acetolactate to a red insoluble complex. The reaction solutions of the recombinant proteins of MvALS1/2/3/5 developed a red colour, indicating that all isozymes produced acetolactate (Figure 3a). The enzymatic properties of the respective isozymes were similar, although the affinity to the substrate pyruvate ( $k_{cat}/K_m$ ) was relatively high in MvALS1.

The ALS activity of each isozyme was also compared by ectopic expression in *A. thaliana*. We transformed *A. thaliana* with an *ALS* gene carrying the Pro197Ser mutation, which endows extreme resistance to some ALS herbicides such as imazosulfuron (Sada et al., 2013). When overexpressed, all four genes driven by the cauliflower mosaic virus 35S promoter conferred resistance to imazosulfuron (Figure 3b-c). Resistance indices of all transgenic lines were correlated with the transcript level of transgenes (*ALS* genes of *M. vaginalis*), and a similar resistance level was observed when the transcripts of the respective *ALS* genes were accumulated at a similar level. Notably, even a small difference in transcript level drastically affected herbicide sensitivity when the transcript levels were within a specific range. For instance, although the transcript levels in three MvALS1 transgenic lines (lines

indicated in pink area in Figure 3b) differed by only 5.1-fold at the maximum, their resistance levels differed by as much as 2,500-fold. Meanwhile, very low or high transcript levels did not affect sensitivity.

We also tested the putative loss-of-function allele of *MvALS5*, as it only partially lacks the  $\gamma$  domain—one of the three ALS domains (Figure 2d). All T2 generations in which the allele of *MvALS5* carrying the Pro197Ser mutation was deleted were sensitive to 10 nM imazosulfuron, while at least seven lines carrying the canonical allele of *MvALS5* showed decreased imazosulfuron sensitivity (Figure S2). This result implies that the deleted form of *MvALS5* does not encode functional ALS.

Collectively, the results of recombinant protein assay and ectopic expression in *A. thaliana* suggest that the activities of the four isozymes were near identical, although a slightly higher substrate specificity was observed in *MvALS1* in the recombinant assay. Notably, the recombinant ALS assay is affected by multiple factors, such as the prediction of the CTP cleavage site and presence of a GST tag, which may have influenced the results for *MvALS1*. Our data suggest that *MvALS2* and *MvALS5* could potentially be involved in the evolution of SU resistance in *M. vaginalis* contrary to the expectation from the nation-wide survey (Figure 2).

### **Transcript levels of *MvALS* genes**

Since no significant differences were observed in recombinant protein assays and ectopic expression in *A. thaliana*, we compared the transcript levels of *ALS* genes in *M. vaginalis* seedlings in the presence or absence of imazosulfuron using mRNA-Seq. *De novo* assembly

followed by the curations of *ALS* contigs, we obtained 84,649 contigs with average length of 802.5 bp.

The transcriptome of herbicide-treated sensitive plants formed a distinct cluster (Figure 4a), indicating that herbicide treatment triggered massive reprogramming of gene expression within 24 h in these plants. Statistical analysis revealed 12,845 differentially expressed contigs between the treated and untreated sensitive populations (Figure S3). In contrast, gene expression in the resistant population remained almost unchanged following herbicide treatment, which was expected based on a previous report that herbicide treatment only slightly suppressed growth in this resistant population (Iwakami et al., 2020). Moreover, the difference between the untreated sensitive and resistant populations was minor, with only 528 differentially expressed contigs (Figure S3).

The transcription of *ALS* genes was almost stable among all populations (Figure 4b). The only exception was *MvALS2*, which was slightly downregulated (2.36-fold,  $q < 0.01$ ) in herbicide-treated sensitive plants. As the differences among the populations were small, we averaged the transcripts per kilobase million (TPM) data of 12 libraries and examined the transcript level of each *ALS* gene. The TPM value of *MvALS1* and *MvALS3* ranked 2,487 and 3,062, respectively, and these values were much higher than the TPM values of *MvALS2*, *MvALS5*, and *MvALS4* (Figure 4c-d). Moreover, respectively 45.3% and 36.9% of the reads mapped to the *ALS* genes were from *MvALS1* and *MvALS3*, followed by 9.6% from *MvALS2*. These findings were consistent with the results of gene cloning (Figure S4). Therefore, the two genes carrying resistance-conferring mutations (*MvALS1* and *MvALS3*) in natural *M. vaginalis* populations were among the most highly expressed *ALS* genes.

383

## 384 **Roles of *MvALS1* and *MvALS3* in resistance evolution**

385 We compared the roles of *MvALS1* and *MvALS3* in the resistant phenotype of *M. vaginalis*.  
 386 Imazosulfuron sensitivity of populations carrying the same mutation in *MvALS1* or *MvALS3*  
 387 was compared. Three populations with the Pro197Ser mutation showed similar GR<sub>50</sub> and  
 388 GR<sub>90</sub> values, irrespective of the mutated genes (Figure 5). Moreover, similar GR<sub>50</sub> and GR<sub>90</sub>  
 389 values were observed in another set of populations carrying the Asp376Glu mutation.  
 390 Therefore, the mutated alleles of *MvALS1* or *MvALS3* equally contribute to resistance in *M.*  
 391 *vaginalis*.

392

## 393 **DISCUSSION**

394 Here, we studied the molecular mechanisms underlying the evolution of herbicide resistance  
 395 in 68 resistant populations of *M. vaginalis* in Japan. Resistance-conferring mutant alleles were  
 396 exclusively identified in two of the five *ALS* genes, namely *MvALS1* and *MvALS3*.  
 397 Sequencing of the coding regions of all *ALS* loci revealed the prevalence of loss-of-function  
 398 alleles in *MvALS4*, implying that *MvALS4* does not meet the criteria of a resistance gene.  
 399 Although the enzymatic properties of the isozymes MvALS1/2/3/5 were similar, the transcript  
 400 levels of genes encoding these isozymes were markedly different. The transcript levels of two  
 401 genes (*MvALS1* and *MvALS3*) carrying the resistance-conferring mutations were higher in  
 402 resistant *M. vaginalis* seedlings. Taken together, these findings suggests that the variable  
 403 transcript levels of the five *ALS* genes shape the biased pattern of resistance-conferring alleles  
 404 in resistant populations of *M. vaginalis* in Japan.

Functional characterisation of *MvALS1/2/3/5* revealed no marked differences in their functions, indicating that *MvALS2* and *MvALS5*, which did not carry resistance-conferring mutations, are the ‘potential’ hotspots for resistance evolution, similar to *MvALS1* and *MvALS3*. However, resistance-conferring mutations in *ALS* genes that exhibit low expression would not confer herbicide resistance in *M. vaginalis* in agricultural fields, as evidenced in transformed *A. thaliana* lines with low *MvALS* expression (Figure 3b). Assuming that the transcript abundance of *ALS* genes is proportional to the amount of *ALS* protein, *MvALS2* and *MvALS5* accounted for <10% of the *ALS* pool, whereas *MvALS1* and *MvALS3* accounted for nearly 40%. This result indicates that over 90% *ALS* would be inhibited by herbicides if a resistance-conferring mutation is present in *MvALS2* or *MvALS5*; this proportion would further decrease in the first generation of plants carrying a spontaneous mutation due to the heterozygous status, and such plants would likely not survive herbicide stress in agricultural fields. In addition to relative abundance, absolute transcript abundance may also play important roles. We observed that *MvALS1* and *MvALS3* were close to the first inflexion point on the sigmoid curve of the transcription ranking plot, while the other three genes were in the middle or lower parts of the curve (Figure 4c). Therefore, *MvALS1* and *MvALS3* may be among the transcriptionally active genes in *M. vaginalis*. Interestingly, three *ALS* genes in hexaploid wheat, each of which confers resistance when Pro197 is substituted (see below), were also placed close to the first inflexion point (Figure S5a). These observations, together with the mRNA–GR<sub>50</sub> relationships in transformed *A. thaliana* (Figure 3b), suggest that a certain degree of transcript abundance may be required for protein expression. Further comparative studies in other species with multiple copies of *ALS* genes

might provide some insights into the transcript levels of *ALS* genes required for resistance expression.

Targeted mutagenesis can be employed to validate whether transcript levels shape the pattern of resistance-conferring mutations in the *ALS* gene family. Recent advances in genome editing tools have enabled the induction of particular mutations in the genes of interest. Zhang et al. (2019) successfully induced mutations at the same codon in each of the three *ALS* genes in hexaploid wheat and observed similar decreases in the SU sensitivity of mutant plants. According to the database (Ramírez-González et al., 2018), the transcript levels of the three *ALS* genes in hexaploid wheat did not differ significantly (Figure S5). Establishment of a transformation system for *M. vaginalis* can enable the above manipulations, which will further our understanding of resistance evolution in this weed.

Meanwhile, we cannot rule out the role of other factors in the biased representation of mutated genes inducing resistance. Firstly, given the observed higher sequence variations in *MvALS1* and *MvALS3* (Figure 2e), the spontaneous mutation rate might be higher for these genes, leading to their overrepresentation. According to the classic evolutionary theory, the spontaneous mutation rate is random across a genome, and the apparent bias is the consequence of fitness costs. However, a recent sequencing study revealed that cytogenetic features influenced the mutation rate itself to a certain degree (Monroe et al., 2020). Thus, the spontaneous mutation rate may drive the biased representation of genes. Secondly, multi-layered DNA repair systems (Kimura & Sakaguchi, 2006) may also play a role in the bias. These repair mechanisms are affected by the flanking sequences, local DNA structure, and gene expression, among other factors, and do not act uniformly throughout the genome.



The local DNA environment of each *ALS* locus may have affected the manifestation of spontaneous DNA mutations. Thirdly, our gene expression results must be interpreted with caution, as we analysed only two populations. There may be natural variations in *ALS* gene expression among *M. vaginalis* populations. However, similar herbicide responses observed among populations carrying the same mutations in this study (Figure 5) may alternatively indicate relatively conserved gene expression among *M. vaginalis* populations in Japan. Large-scale analyses, such as population transcriptomics, combined with comprehensive investigations of differential mutation rates in the *ALS* gene family would provide a more holistic view of evolutionary patterns in *M. vaginalis*.

Notably, resistance-conferring mutations were more frequent in *MvALS1* than in *MvALS3* (Figure 2a). This may be because a mutation in *MvALS1* may confer higher resistance than that in *MvALS3*, which is beneficial to plants, particularly those carrying mutations conferring low resistance, such as Pro197Leu (e.g. Sada et al., 2013), in the heterozygous status. However, comparison of plants carrying the identical mutations in different genes did not reveal significant differences in herbicide sensitivity (Figure 5), which is in agreement with an independent study (K. Ohta, Y. Fujino & Y. Sada, unpublished). Furthermore, in transformed *A. thaliana*, *MvALS1* and *MvALS3* conferred a similar level of resistance when expressed equally (Figure 3b). Thus, although higher substrate affinity was detected for *MvALS1* in our recombinant enzyme assay (Figure 3a), other factors (e.g. the bias of material sampling) were likely responsible for the bias between *MvALS1* and *MvALS3*.

The present country-scale study identified TSR mutations that have rarely been reported in the natural weed population. Substitutions of Ala205 and Asp376 have frequently

been reported in diverse species, but Ala205Thr and Asp376Asn have not been reported (Tranel, Wright, & Heap, 2021). Moreover, double resistance-conferring mutations in a single gene or a single mutation each in two genes have rarely been reported. These mutations are particularly rare in predominantly self-pollinating species, probably because a single mutation often confers sufficient resistance to field-applied herbicides. Regarding the discovery of rare mutations, we speculate that the transition of herbicide use in Japan may have played an important role. In Japan, the introduction of SU herbicides, such as bensulfuron-methyl and imazosulfuron, in the late 1980s led to the explosion of resistance evolution from the mid-1990s to the early 2000s (Peterson, Collavo, Ovejero, Shivrain, & Walsh, 2018). Mutations at the Pro197 codon was inferred to be the major mechanism of evolved resistance in weeds during this SU selection period (Yu & Powles, 2014). Indeed, the Pro197 mutation was the most frequently reported in *Schoenoplectiella juncooides* and *Lindernia* spp. (Uchino et al., 2007; Uchino & Watanabe, 2002) as well as in *M. vaginalis* in this study (Figure 2b). For the management of these resistant weeds, ALS herbicides belonging to different chemical classes such as penoxsulam and pyrimisulfan or recently commercialised SU herbicides such as propyrisulfuron and metazosulfuron, all of which are effective against resistant plants with mutations at the Pro197 residue, have been used. Transition to these new ALS herbicides may have driven the evolution of the above rarely reported mutations, specifically double mutants carrying Asp376Glu, which confers resistance to ALS herbicides of all chemical classes (Tranel et al., 2021). The sensitivity of these new mutations to various ALS herbicides should be studied for predicting the dynamics of resistance mechanisms in *M. vaginalis*.

The presence or absence of variation in loss-of-function mutations within an *ALS*

gene have not been reported in natural weed populations. While the loss-of-function mutations in *ALS* genes are considered lethal in species with a single copy of that *ALS* gene, loss-of-function alleles of a single *ALS* gene could be induced by targeted mutagenesis in a species with multiple copies of *ALS* genes (Butler, Atkins, Voytas, & Douches, 2015; Veillet et al., 2019). High expression of either *MvALS1* or *MvALS3* would be sufficient to produce the minimum amount of branched-chain amino acids required in *M. vaginalis*. Meanwhile, it would be interesting to compare the fitness of individuals with or without loss-of-function mutations, particularly in plants with loss-of-function mutations in *MvALS1*, which was revealed to be highly expressed in the present study.

In conclusion, comprehensive analysis of *ALS* gene sequences in Japanese populations of *M. vaginalis* revealed that variable transcript levels of these genes are associated with the biased patterns of mutations for the evolution of herbicide resistance. This study provides a novel insight that gene expression quantitatively provides evolutionary competency to potential hotspots across genome. In other words, gene expression level can act as a genomic constraint for the parallel evolution of herbicide resistance. Of note, the Japanese populations of *M. vaginalis* may only reflect a particular genetic group of this globally distributed weed (mainly in eastern and southern Asia), considering that Japan is a small island country. Thus, further large-scale studies of the global populations would provide a more comprehensive understanding of the evolutionary strategies of herbicide resistance in *M. vaginalis*, which may not be limited to the two hotspots (*MvALS1* and *MvALS3*) detected in this study. In the era of genomics, it is anticipated that numerous genomes with more complex DNA structures, such as polyploid genomes, will be compiled, which will inevitably

impose more attention to the roles of redundant copies during the course of evolution. The perspective and framework of this study are applicable to research on TSR evolution in agricultural weeds as well as broader studies focusing on the process of bias for genetic loci in parallel evolution.

## ACKNOWLEDGEMENTS

We thank Nihon Nohyaku for providing seeds of *Monochoria vaginalis*, and members of the weed science lab in Kyoto University for the cooperation to collect *M. vaginalis*, Yuri Nakamura for technical assistance. Computations were partially performed on the NIG supercomputer at ROIS National Institute of Genetics. This work was partly supported by Japan Association for Advancement of Phyto-Regulators (JAPR) grant no. 2017-4, 2018-4 (to A.U. and S.I.), 2019-2 (to S.O. and S.I.).

## AUTHOR CONTRIBUTIONS

Project Conception, S.I.; Experimental Design, S.T., T.M., and S.I.; Performance of Experiments, S.T., A.U., S.O., S.I.; Bioinformatics Analysis, S.T. and S.I.; Material Collection and/or Maintenance, S.T., A.U., S.O., C.M., K.H., M.M., N.Y., N.U., Y.T., N.F., E.K., Y.S., T.T., and S.I.; Visualization, S.T. and S.I.; Writing, S.I.; Supervision, T.T., S.I.

## DATA ACCESSIBILITY:

mRNA-Seq data have been deposited in the DDBJ Sequence Read Archive (DRA) database with BioProject ID PRJDB11326 (BioSample: SSUB017551).

## REFERENCES

- Baucom, R. S. (2019). Evolutionary and ecological insights from herbicide-resistant weeds: what have we learned about plant adaptation, and what is left to uncover? *New Phytologist*, 223, 68-82.
- Bedbrook, J. R., Chaleff, R. S., Falco, S. C., Mazur, B. J., Somerville, C. R., & Yadav, N. S. (1995).
- Bolger, A. M., Lohse, M., & Usadel, B. (2014). Trimmomatic: a flexible trimmer for Illumina sequence data. *Bioinformatics*, 30, 2114-2120.
- Butler, N. M., Atkins, P. A., Voytas, D. F., & Douches, D. S. (2015). Generation and inheritance of targeted mutations in potato (*Solanum tuberosum* L.) using the CRISPR/Cas system. *PLoS One*, 10, e0144591.
- Camacho, C., Coulouris, G., Avagyan, V., Ma, N., Papadopoulos, J., Bealer, K., & Madden, T. L. (2009). BLAST+: architecture and applications. *BMC Bioinformatics*, 10, 421.
- Chang, A. K., & Duggleby, R. G. (1997). Expression, purification and characterization of *Arabidopsis thaliana* acetohydroxyacid synthase. *Biochemical Journal*, 327, 161-169.
- Clark, J. W., & Donoghue, P. C. J. (2018). Whole-genome duplication and plant macroevolution. *Trends in Plant Science*, 23, 933-945.
- Czechowski, T., Stitt, M., Altmann, T., Udvardi, M. K., & Scheible, W. R. (2005). Genome-wide identification and testing of superior reference genes for transcript normalization in *Arabidopsis*. *Plant Physiology*, 139, 5-17.
- Délye, C., Boucansaud, K., Pernin, F., & Le Corre, V. (2009). Variation in the gene encoding acetolactate-synthase in *Lolium* species and proactive detection of mutant, herbicide-resistant alleles. *Weed Research*, 49, 326-336.
- Delye, C., Causse, R., & Michel, S. (2016). Genetic basis, evolutionary origin and spread of resistance to herbicides inhibiting acetolactate synthase in common groundsel (*Senecio vulgaris*). *Pest Management Science*, 72, 89-102.
- Délye, C., Pernin, F., & Scarabel, L. (2011). Evolution and diversity of the mechanisms endowing resistance to herbicides inhibiting acetolactate-synthase (ALS) in corn poppy (*Papaver rhoeas* L.). *Plant Science*, 180, 333-342.
- Deng, W., Yang, Q., Zhang, Y., Jiao, H., Mei, Y., Li, X., & Zheng, M. (2017). Cross-resistance patterns to acetolactate synthase (ALS)-inhibiting herbicides of flixweed (*Descurainia sophia* L.) conferred by different combinations of ALS isozymes with a Pro-197-Thr mutation or a novel Trp-574-Leu mutation. *Pesticide Biochemistry and Physiology*,

136, 41-45.

Dimaano, N. G., Yamaguchi, T., Fukunishi, K., Tominaga, T., & Iwakami, S. (2020). Functional characterization of cytochrome P450 CYP81A subfamily to disclose the pattern of cross-resistance in *Echinochloa phyllopogon*. *Plant Molecular Biology*, 102, 403-416.

Duggleby, R. G., Pang, S. S., Yu, H., & Guddat, L. W. (2003). Systematic characterization of mutations in yeast acetohydroxyacid synthase. Interpretation of herbicide-resistance data. *European Journal of Biochemistry*, 270, 2895-2904.

Fukano, Y., Guo, W., Uchida, K., Tachiki, Y., & Cornelissen, H. (2020). Contemporary adaptive divergence of plant competitive traits in urban and rural populations and its implication for weed management. *Journal of Ecology*, 108, 2521-2530.

Grabherr, M. G., Haas, B. J., Yassour, M., Levin, J. Z., Thompson, D. A., Amit, I., . . . Regev, A. (2011). Full-length transcriptome assembly from RNA-Seq data without a reference genome. *Nature Biotechnology*, 29, 644-652.

Guo, F., Iwakami, S., Yamaguchi, T., Uchino, A., Sunohara, Y., & Matsumoto, H. (2019). Role of CYP81A cytochrome P450s in clomazone metabolism in *Echinochloa phyllopogon*. *Plant Science*, 283, 321-328.

Hamamura, K. (2018). Development of herbicides for paddy rice in Japan. *Weed Biology and Management*, 18, 75-91.

Hamamura, K., Muraoka, T., Hashimoto, J., Tsuruya, A., Takahashi, H., Takeshita, T., & Noritake, K. (2003). Identification of sulfonylurea-resistant biotypes of paddy field weeds using a novel method based on their rooting responses. *Weed Biology and Management*, 3, 242-246.

Heap, I. (2021). The international survey of herbicide resistant weeds. Online. Internet. Thursday, February 11, 2021. Available [www.weedscience.com](http://www.weedscience.com).

Holm, L. G., Plucknett, D. L., Pancho, J. V., & Herberger, J. P. (1977). *The world's worst weeds. Distribution and biology*. Honolulu: University of Hawaii.

Iwakami, S., Kamidate, Y., Yamaguchi, T., Ishizaka, M., Endo, M., Suda, H., . . . Matsumoto, H. (2019). CYP81A P450s are involved in concomitant cross-resistance to acetolactate synthase and acetyl-CoA carboxylase herbicides in *Echinochloa phyllopogon*. *New Phytologist*, 221, 2112-2122.

Iwakami, S., Tanigaki, S., Uchino, A., Ozawa, Y., Tominaga, T., & Wang, G. X. (2020). Characterization of the acetolactate synthase gene family in sensitive and resistant

604 biotypes of two tetraploid *Monochoria* weeds, *M. vaginalis* and *M. korsakowii*.  
605 *Pesticide Biochemistry and Physiology*, 165, 104506.

606 Iwakami, S., Uchino, A., Watanabe, H., Yamasue, Y., & Inamura, T. (2012). Isolation and  
607 expression of genes for acetolactate synthase and acetyl-CoA carboxylase in  
608 *Echinochloa phyllopogon*, a polyploid weed species. *Pest Management Science*, 68,  
609 1098-1106.

610 Kimura, S., & Sakaguchi, K. (2006). DNA Repair in Plants. *Chemical Reviews*, 106, 753-766.

611 Kreiner, J. M., Stinchcombe, J. R., & Wright, S. I. (2018). Population genomics of herbicide  
612 resistance: adaptation via evolutionary rescue. *Annual Review of Plant Biology*, 69,  
613 611-635.

614 Langmead, B., & Salzberg, S. L. (2012). Fast gapped-read alignment with Bowtie 2. *Nature*  
615 *Methods*, 9, 357-359.

616 Li, B., & Dewey, C. N. (2011). RSEM: accurate transcript quantification from RNA-Seq data  
617 with or without a reference genome. *BMC Bioinformatics*, 12, 323.

618 Löbmann, A., Schulte, M., Runge, F., Christen, O., & Petersen, J. (2021). Occurrence,  
619 resistance factors and cross-resistance patterns to herbicides inhibiting acetolactate  
620 synthase (ALS) of *Echinochloa crus-galli* (L.) Pal. Beauv. in Central Europe. *Journal*  
621 *of Plant Diseases and Protection*. Retrieved from doi:10.1007/s41348-021-00434-1

622 Martin, A., & Orgogozo, V. (2013). The loci of repeated evolution: a catalog of genetic  
623 hotspots of phenotypic variation. *Evolution*, 67, 1235-1250.

624 Martin, M. (2011). Cutadapt removes adapter sequences from high-throughput sequencing  
625 reads. *EMBnet.journal*, 17.

626 Monroe, J. G., Srikant, T., Carbonell-Bejerano, P., Exposito-Alonso, M., Weng, M.-L., Rutter,  
627 M. T., . . . Weigel, D. (2020). Mutation bias shapes gene evolution in *Arabidopsis*  
628 *thaliana*. *bioRxiv*. Retrieved from doi:<https://doi.org/10.1101/2020.06.17.156752>

629 Motohashi, K. (2015). A simple and efficient seamless DNA cloning method using SLiCE  
630 from *Escherichia coli* laboratory strains and its application to SLiP site-directed  
631 mutagenesis. *BMC Biotechnology*, 15, 47.

632 Murashige, T., & Skoog, F. (1962). A revised medium for rapid growth and bio assays with  
633 tobacco tissue cultures. *Physiologia Plantarum*, 15, 473-497.

634 Murray, M., & Thompson, W. F. (1980). Rapid isolation of high molecular weight plant DNA.  
635 *Nucleic Acids Research*, 8, 4321-4326.

636 Ohsako, T., & Tominaga, T. (2007). Nucleotide substitutions in the acetolactate synthase



637 genes of sulfonylurea-resistant biotypes of *Monochoria vaginalis* (Pontederiaceae).  
638 *Genes & Genetic Systems*, 82, 207-215.

639 Ono, H., Ishii, K., Kozaki, T., Ogiwara, I., Kanekatsu, M., & Yamada, T. (2015). Removal of  
640 redundant contigs from *de novo* RNA-Seq assemblies via homology search improves  
641 accurate detection of differentially expressed genes. *BMC Genomics*, 16, 1031.

642 Peters, B., & Streck, H. J. (2018). Herbicide discovery in light of rapidly spreading resistance  
643 and ever-increasing regulatory hurdles. *Pest Management Science*, 74, 2211-2215.

644 Peterson, M. A., Collavo, A., Ovejero, R., Shivrain, V., & Walsh, M. J. (2018). The challenge  
645 of herbicide resistance around the world: a current summary. *Pest Management*  
646 *Science*, 74, 2246-2259.

647 Powles, S. B., & Yu, Q. (2010). Evolution in action: plants resistant to herbicides. *Annual*  
648 *Review of Plant Biology*, 61, 317-347.

649 Ramírez-González, R., Borrill, P., Lang, D., Harrington, S., Brinton, J., Venturini, L., . . .  
650 Pasha, A. (2018). The transcriptional landscape of polyploid wheat. *Science*, 361.

651 Ritz, C., Baty, F., Streibig, J. C., & Gerhard, D. (2015). Dose-response analysis using R. *PLoS*  
652 *One*, 10, e0146021.

653 Robinson, M. D., McCarthy, D. J., & Smyth, G. K. (2010). edgeR: a Bioconductor package  
654 for differential expression analysis of digital gene expression data. *Bioinformatics*, 26,  
655 139-140.

656 Rozas, J., Ferrer-Mata, A., Sanchez-DelBarrio, J. C., Guirao-Rico, S., Librado, P.,  
657 Ramos-Onsins, S. E., & Sanchez-Gracia, A. (2017). DnaSP 6: DNA Sequence  
658 Polymorphism Analysis of Large Data Sets. *Molecular Biology and Evolution*, 34,  
659 3299-3302.

660 Sada, Y., Ikeda, H., & Kizawa, S. (2013). Resistance levels of sulfonylurea - resistant  
661 *Schoenoplectus juncooides* (Roxb.) Palla with various Pro197 mutations in acetolactate  
662 synthase to imazosulfuron, bensulfuron - methyl, metsulfuron - methyl and  
663 imazaquin - ammonium. *Weed Biology and Management*, 13, 53-61.

664 Sada, Y., & Uchino, A. (2017). Biology and mechanisms of sulfonylurea resistance in  
665 *Schoenoplectiella juncooides*, a noxious sedge in the rice paddy fields of Japan. *Weed*  
666 *Biology and Management*, 17, 125-135.

667 Scarabel, L., Locascio, A., Furini, A., Sattin, M., & Varotto, S. (2010). Characterisation of  
668 ALS genes in the polyploid species *Schoenoplectus mucronatus* and implications for  
669 resistance management. *Pest Management Science*, 66, 337-344.



- Schmittgen, T. D., & Livak, K. J. (2008). Analyzing real-time PCR data by the comparative C(T) method. *Nature Protocols*, 3, 1101-1108.
- Singh, B., Schmitt, G., Lillis, M., Hand, J. M., & Misra, R. (1991). Overexpression of acetohydroxyacid synthase from *Arabidopsis* as an inducible fusion protein in *Escherichia coli*: production of polyclonal antibodies, and immunological characterization of the enzyme. *Plant Physiology*, 97, 657-662.
- Svitashev, S., Young, J. K., Schwartz, C., Gao, H., Falco, S. C., & Cigan, A. M. (2015). Targeted mutagenesis, precise gene editing, and site-specific gene insertion in maize using Cas9 and guide RNA. *Plant Physiology*, 169, 931-945.
- Tranel, P. J., & Wright, T. R. (2002). Resistance of weeds to ALS-inhibiting herbicides: what have we learned? *Weed Science*, 50, 700-712.
- Tranel, P. J., Wright, T. R., & Heap, I. M. (2021). Mutations in herbicide-resistant weeds to ALS inhibitors. Retrieved accessed 11 May 2019 <http://www.weedscience.com>
- Uchino, A., Ogata, S., Kohara, H., Yoshida, S., Yoshioka, T., & Watanabe, H. (2007). Molecular basis of diverse responses to acetolactate synthase-inhibiting herbicides in sulfonylurea-resistant biotypes of *Schoenoplectus juncooides*. *Weed Biology and Management*, 7, 89-96.
- Uchino, A., & Watanabe, H. (2002). Mutations in the acetolactate synthase genes of sulfonylurea-resistant biotypes of *Lindernia* spp. *Weed Biology and Management*, 2, 104-109.
- Veillet, F., Perrot, L., Chauvin, L., Kermarrec, M. P., Guyon-Debast, A., Chauvin, J. E., . . . Mazier, M. (2019). Transgene-free genome editing in tomato and potato plants using agrobacterium-mediated delivery of a CRISPR/Cas9 cytidine base editor. *International Journal of Molecular Sciences*, 20.
- Waselkov, K. E., Regenold, N. D., Lum, R. C., & Olsen, K. M. (2020). Agricultural adaptation in the native North American weed waterhemp, *Amaranthus tuberculatus* (Amaranthaceae). *PLoS One*, 15, e0238861.
- Wedger, M. J., & Olsen, K. M. (2018). Evolving insights on weedy rice. *Ecological Genetics and Genomics*, 7-8, 23-26.
- Weng, M. L., Becker, C., Hildebrandt, J., Neumann, M., Rutter, M. T., Shaw, R. G., . . . Fenster, C. B. (2019). Fine-grained analysis of spontaneous mutation spectrum and frequency in *Arabidopsis thaliana*. *Genetics*, 211, 703-714.
- Xu, Y., Xu, L., Li, X., & Zheng, M. (2020). Investigation of resistant level to

703       tribenuron-methyl, diversity and regional difference of the resistant mutations on  
704       acetolactate synthase (ALS) isozymes in *Descurainia sophia* L. from China. *Pesticide*  
705       *Biochemistry and Physiology*, 104653.

706       Yamato, S., Sada, Y., & Ikeda, H. (2013). Characterization of acetolactate synthase from  
707       sulfonylurea herbicide-resistant *Schoenoplectus juncooides*. *Weed Biol Manag*, 13,  
708       104-113.

709       Ye, C. Y., Tang, W., Wu, D., Jia, L., Qiu, J., Chen, M., . . . Fan, L. (2019). Genomic evidence  
710       of human selection on Vavilovian mimicry. *Nature Ecology & Evolution*, 3,  
711       1474-1482.

712       Yu, Q., & Powles, S. B. (2014). Resistance to AHAS inhibitor herbicides: current  
713       understanding. *Pest Management Science*, 70, 1340-1350.

714       Zhang, R., Liu, J., Chai, Z., Chen, S., Bai, Y., Zong, Y., . . . Gao, C. (2019). Generation of  
715       herbicide tolerance traits and a new selectable marker in wheat using base editing.  
716       *Nature Plants*, 5, 480-485.

717

718

## Figure legends

### Figure 1. *Monochoria vaginalis* studied in this work

(a) Infestation of *M. vaginalis* in paddy fields in Japan. (b) Collection sites of *M. vaginalis*. *MvALS1*, populations carrying resistance-conferring mutations in *MvALS1*; *MvALS3*, populations carrying resistance-conferring mutations in *MvALS3*; *MvALS1&3*, populations carrying resistance-conferring mutations in *MvALS1* and *MvALS3*; N.D., populations with no resistance-conferring mutations in *ALS* genes. (c) Methods for resistance diagnosis. In rooting assay, roots were cut at 1 cm from the base of shoots and placed in bensulfuron-methyl solution for 7-10 days. Plants with emerging roots were diagnosed as resistant. In the pot assay, seeds were germinated in a tube, followed by transplantation to pots filled with autoclaved soil. The recommended dose of imazosulfuron (90 g a.i.·ha<sup>-1</sup>) was applied at the three-leaf stage. Plant survival was evaluated at 3 weeks post application.

### Figure 2. *ALS* genes of *Monochoria vaginalis*

(a) Status of *ALS* genes in 68 resistant populations analysed in this study. YNZ1 carries mutations both in *MvALS1* and *MvALS3*. AIZ2 and KR1 carry two independent mutations in *MvALS1*. F.S., frameshift mutation. (b) Patterns of resistance-conferring mutations. (c) Patterns of DNA conversions of resistance-conferring mutations. (d) Schematic representation of frameshifted alleles found in *MvALS1*, *MvALS4*, and *MvALS5*. *MvALS4* alleles encoding the canonical form of *ALS* were not detected in the present study. Triangles represent a premature stop codon. (e) Nucleotide variations in the five *ALS* genes. The coding sequences of 68 resistant and 31 sensitive populations were analysed. The plot shows nucleotide

diversity calculated at each nucleotide position. Positions causing an amino acid replacement that confers resistance are indicated in red. Nucleotide diversity of the entire genes ( $\pi$ ) and haplotype numbers were calculated.

### **Figure 3. Enzymatic functions of ALS encoded by each gene of *Monochoria vaginalis***

(a) Enzymatic properties of recombinant ALS. (b) Relationship of transcript level and imazosulfuron sensitivity in transgenic *Arabidopsis thaliana* expressing each ALS gene. The site-directly mutated allele of each gene (Pro197Ser) was transformed into *A. thaliana*. (c) Response of transgenic *A. thaliana* to 10 nM imazosulfuron. The plants correspond to the lines indicated by circles in Figure 3b.

### **Figure 4. Expression of ALS genes in *Monochoria vaginalis***

(a) Transcriptome of sensitive (S) and resistant (R) *M. vaginalis* with or without herbicide imazosulfuron (H) application. Transcriptome of the R plants was almost unchanged, while that of the S plants was drastically affected. (b) Transcripts per kilobase million (TPM) of each ALS gene.  $*q < 0.05$ . (c) Expression rank in *M. vaginalis* transcriptome. Data represent the average of 12 mRNA-Seq samples. (d) Relative transcript abundance of ALS genes in *M. vaginalis*.

### **Figure 5. Herbicide sensitivity of *Monochoria vaginalis* carrying a mutation in *MvALS1* and *MvALS3***

(a) *M. vaginalis* 3 weeks post imazosulfuron application. (b) Dose response to imazosulfuron.

763 Bars represent standard error (n=3). (c) Doses that inhibited the growth to 50% (GR<sub>50</sub>) and  
764 90% (GR<sub>90</sub>).

765

**(a)**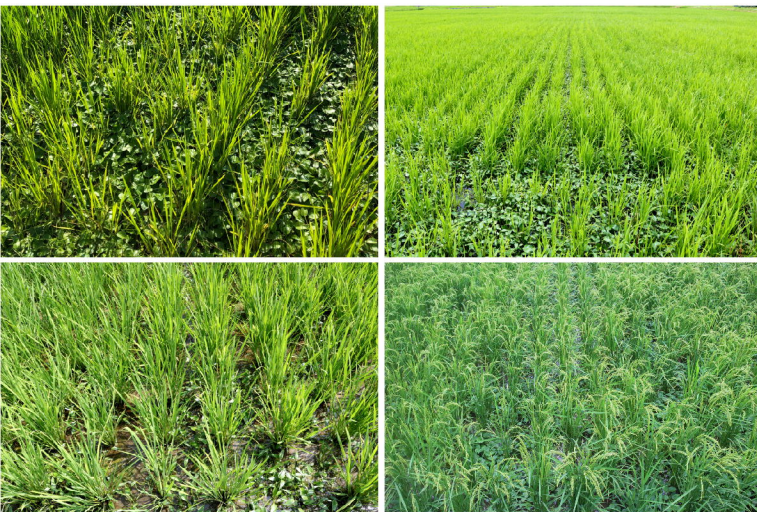**(b)**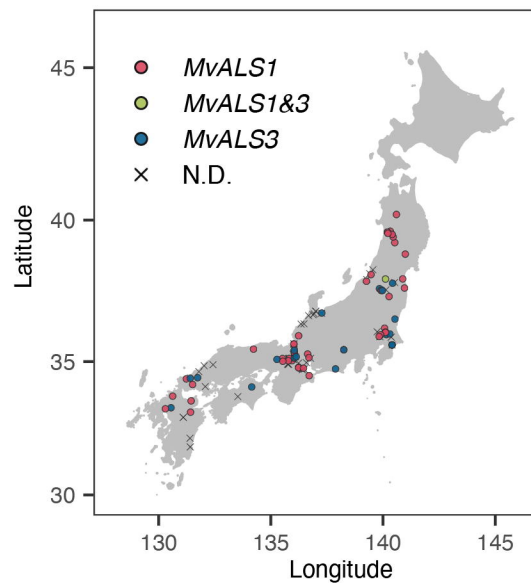**(c)**

### 1. Rooting assay

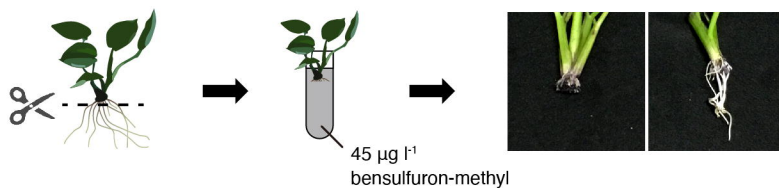

### 2. Pot assay

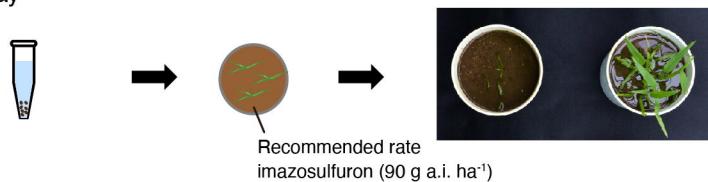

(a)

| Population | MvALS1       | MvALS2 | MvALS3 | MvALS4 | MvALS5 |
|------------|--------------|--------|--------|--------|--------|
| YOK1       | D376E        | -      | -      | F.S.   | -      |
| DSN1       | P197H        | -      | -      | F.S.   | -      |
| DSN2       | P197S        | -      | -      | F.S.   | -      |
| DSN3       | D376E        | -      | -      | F.S.   | -      |
| ODT1       | P197S        | -      | -      | F.S.   | -      |
| AKT1       | P197S        | -      | -      | F.S.   | -      |
| AKT2       | P197S        | -      | -      | F.S.   | -      |
| AKT3       | D376E        | -      | -      | F.S.   | -      |
| KUR1       | P197H        | -      | -      | F.S.   | -      |
| KUR2       | P197A        | -      | -      | F.S.   | -      |
| MSM1       | P197S        | -      | -      | F.S.   | -      |
| TKU1       | P197L        | -      | -      | F.S.   | F.S.   |
| TKU2       | D376E        | -      | -      | F.S.   | -      |
| TKU3       | P197S        | -      | -      | F.S.   | -      |
| TKU4       | P197S        | -      | -      | F.S.   | -      |
| TKU5       | P197H        | -      | -      | F.S.   | -      |
| NDA1       | D376N        | -      | -      | F.S.   | F.S.   |
| ETZ1       | P197H        | -      | -      | F.S.   | -      |
| KTK1       | P197T        | -      | -      | F.S.   | -      |
| TRG1       | D376E        | -      | -      | F.S.   | F.S.   |
| TRG3       | D376E        | -      | -      | F.S.   | F.S.   |
| NRS1       | P197S        | -      | -      | F.S.   | -      |
| ANP1       | A205T        | -      | -      | F.S.   | -      |
| AIS1       | P197H        | -      | -      | F.S.   | F.S.   |
| KST1       | P197S        | -      | -      | F.S.   | -      |
| TKS1       | P197H        | -      | -      | F.S.   | -      |
| TKS4       | P197H        | -      | -      | F.S.   | -      |
| TKS8       | P197H        | -      | -      | F.S.   | -      |
| TNB1       | D376E        | -      | -      | F.S.   | -      |
| KU1        | D376E        | -      | -      | F.S.   | -      |
| KMO1       | P197S        | -      | -      | F.S.   | -      |
| ISE1       | P197S        | -      | -      | F.S.   | -      |
| IGA1       | A205V        | -      | -      | F.S.   | -      |
| IGA2       | P197L        | -      | -      | F.S.   | F.S.   |
| IGA3       | P197S        | -      | -      | F.S.   | -      |
| TSU3       | P197S        | -      | -      | F.S.   | -      |
| TOT1       | P197L        | -      | -      | F.S.   | -      |
| YMG2       | P197S        | -      | -      | F.S.   | -      |
| FUK1       | P197S        | -      | -      | F.S.   | -      |
| TKE1       | P197S        | -      | -      | F.S.   | -      |
| TKD1       | P197H        | -      | -      | F.S.   | -      |
| SGA1       | D376E        | -      | -      | F.S.   | -      |
| AIZ2       | P197S, D376E | -      | -      | F.S.   | F.S.   |
| KR1        | P197S, D376E | -      | -      | F.S.   | -      |
| MRK2       | P197L        | -      | -      | F.S.   | F.S.   |
| AGN1       | P197S        | -      | -      | F.S.   | -      |
| NGT1       | P197S        | -      | -      | F.S.   | -      |
| YNZ1       | D376E        | -      | P197S  | F.S.   | -      |
| KTG1       | -            | -      | P197S  | F.S.   | -      |
| TYM2       | -            | -      | P197A  | F.S.   | -      |
| USK1       | -            | -      | P197S  | F.S.   | -      |
| HIT1       | -            | -      | P197S  | F.S.   | -      |
| MIU1       | -            | -      | P197S  | F.S.   | -      |
| SMM23      | -            | -      | P197S  | F.S.   | -      |
| SMM3       | -            | -      | P197S  | F.S.   | F.S.   |
| SMM4       | -            | -      | P197S  | F.S.   | -      |
| NRS2       | -            | -      | D376E  | F.S.   | -      |
| IWT1       | -            | -      | D376E  | F.S.   | -      |
| TKS6       | -            | -      | P197H  | F.S.   | -      |
| NTN1       | -            | -      | P197L  | F.S.   | -      |
| MIM1       | -            | -      | P197S  | F.S.   | -      |
| KRM1       | -            | -      | P197S  | F.S.   | -      |
| FK1        | -            | -      | D376E  | F.S.   | -      |
| AIZ1       | -            | -      | P197T  | F.S.   | -      |
| OMH1       | -            | -      | P197S  | F.S.   | -      |
| OMH2       | -            | -      | P197S  | F.S.   | -      |
| YMG1       | -            | -      | D376E  | F.S.   | -      |
| HG1        | F.S.         | -      | P197A  | F.S.   | -      |

(b)

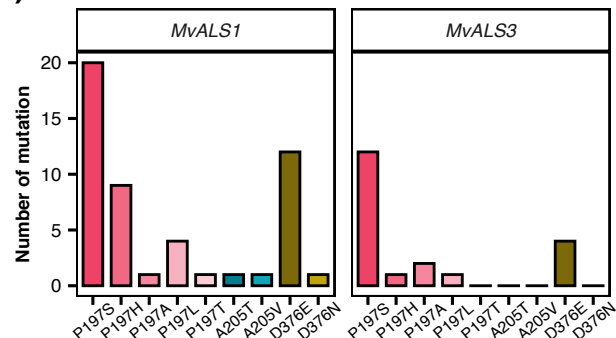

(c)

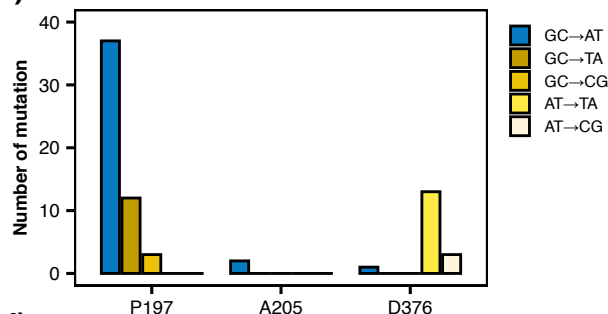

(d)

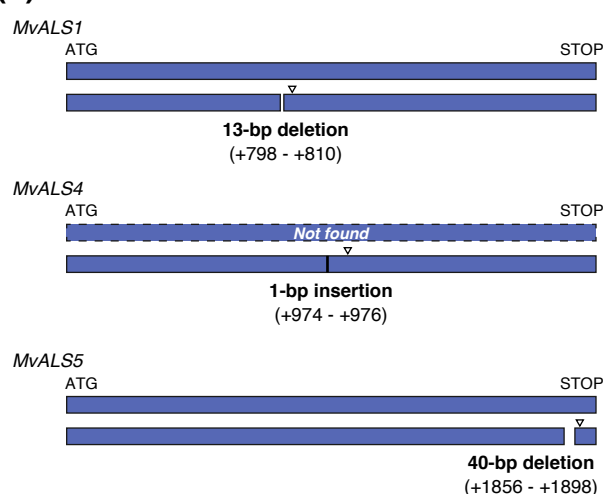

(e)

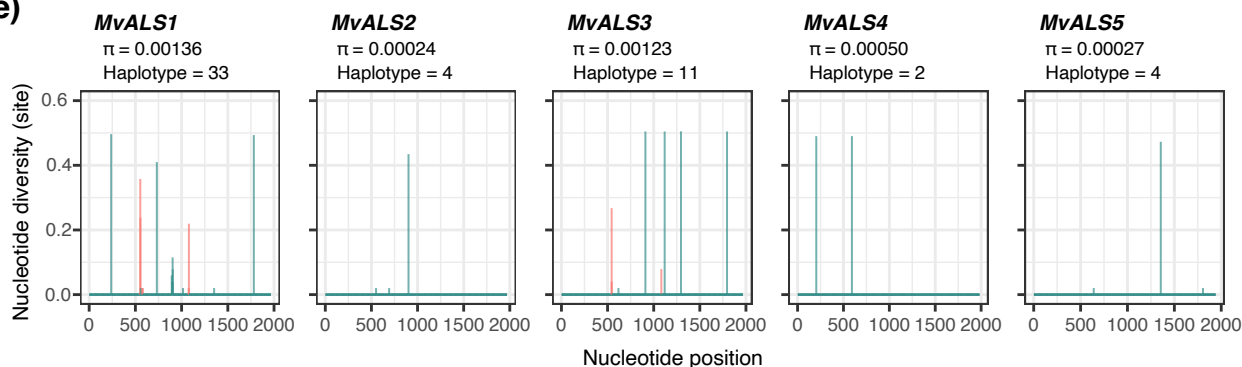

(a)

| Gene          | Reaction                                                                          | $k_{cat}$ (min <sup>-1</sup> ) | $K_m$ (mM)   | $k_{cat}/K_m$ (min <sup>-1</sup> mM <sup>-1</sup> ) |
|---------------|-----------------------------------------------------------------------------------|--------------------------------|--------------|-----------------------------------------------------|
| (control)     |  | —                              | —            | —                                                   |
| <i>MvALS1</i> |  | 0.95 ± 0.06                    | 8.53 ± 1.51  | 0.111 ± 0.021                                       |
| <i>MvALS2</i> |  | 0.83 ± 0.07                    | 13.13 ± 3.03 | 0.063 ± 0.016                                       |
| <i>MvALS3</i> |  | 0.78 ± 0.05                    | 17.25 ± 2.42 | 0.045 ± 0.007                                       |
| <i>MvALS5</i> |  | 0.81 ± 0.04                    | 14.51 ± 1.70 | 0.056 ± 0.007                                       |

(b)

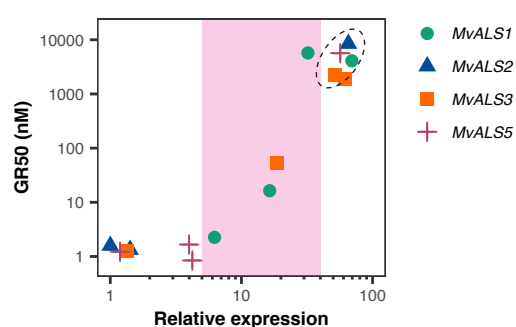

(c)

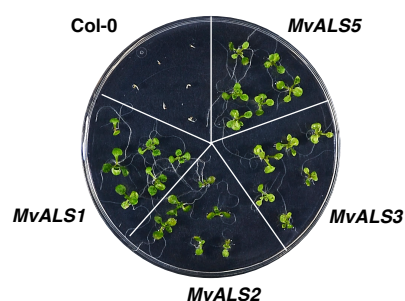



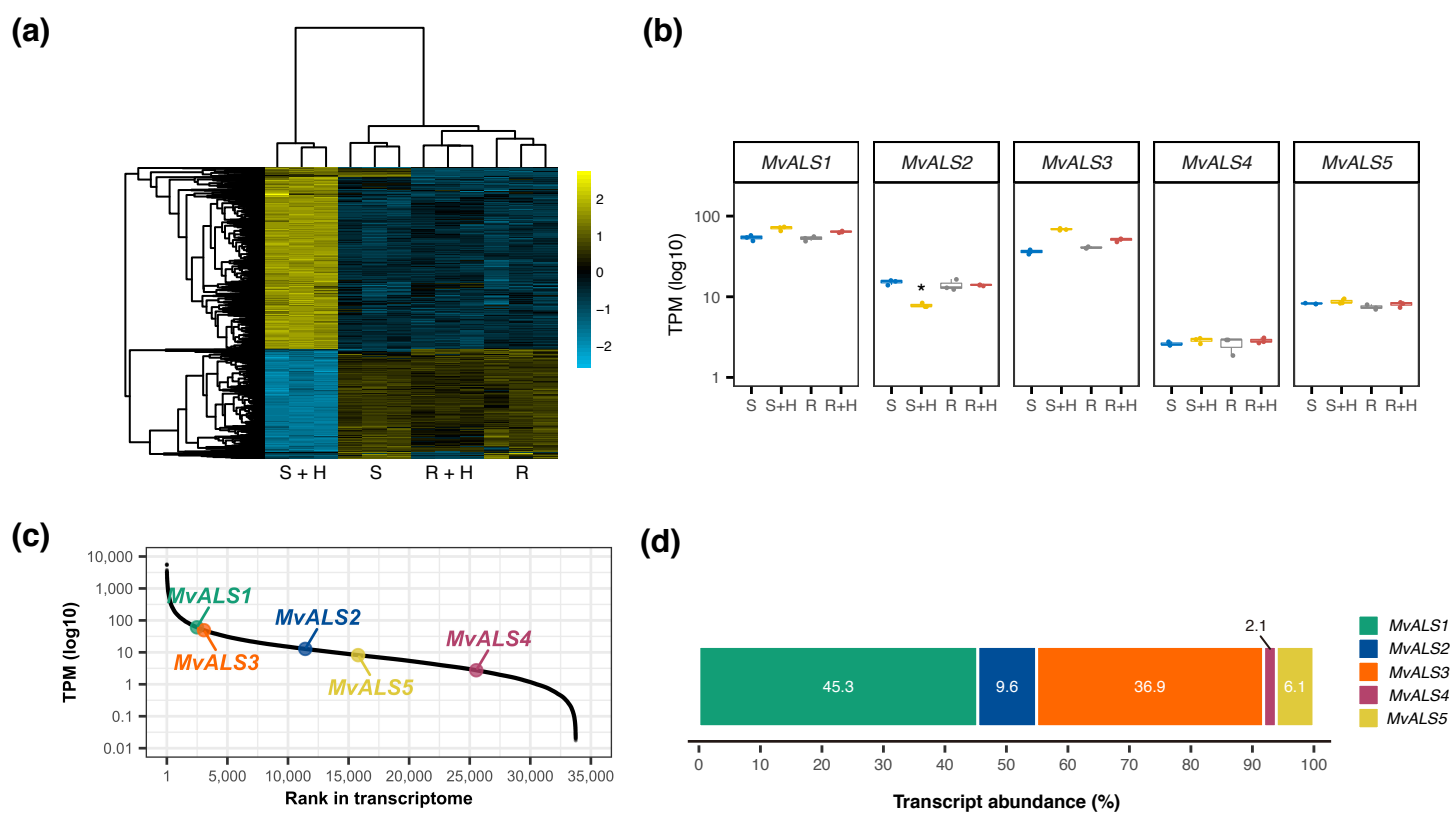

**(a)**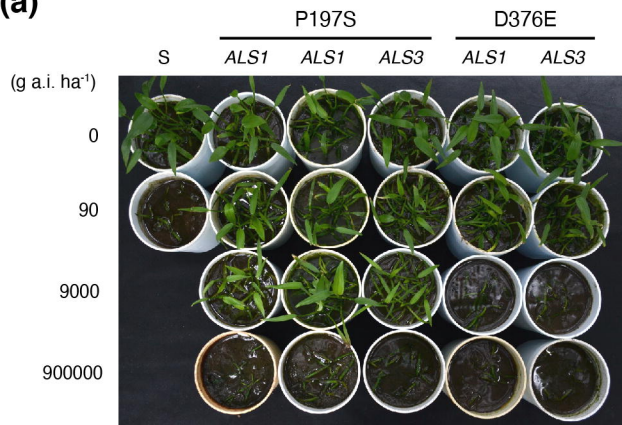**(b)**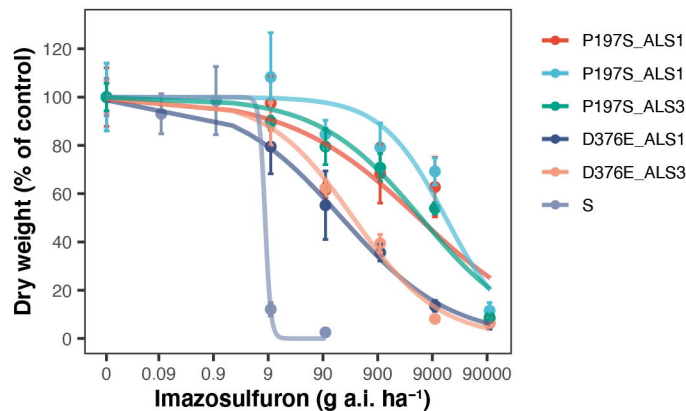**(c)**

| Population | Mutation | Gene          | GR <sub>50</sub>        |      | GR <sub>90</sub>        |       |
|------------|----------|---------------|-------------------------|------|-------------------------|-------|
|            |          |               | g a.i. ha <sup>-1</sup> | R/S  | g a.i. ha <sup>-1</sup> | R/S   |
| KST1       | P197S    | <i>MvALS1</i> | 15799                   | 2000 | 308232                  | 30219 |
| KOM1       | P197S    | <i>MvALS1</i> | 5029.9                  | 637  | 211830                  | 20768 |
| SMM23      | P197S    | <i>MvALS3</i> | 5553.9                  | 703  | 630419                  | 61806 |
| AKT3       | D376E    | <i>MvALS1</i> | 197.5                   | 25   | 29757                   | 2917  |
| NRS2       | D376E    | <i>MvALS3</i> | 323                     | 41   | 17118                   | 1678  |
| SMM13      | -        | -             | 7.9                     | 1    | 10.2                    | 1     |
